# Supplementary material for: Study protocol for a stepped-wedge randomized cookstove intervention in rural Honduras: household air pollution and cardiometabolic health
Source: PubMed Central journal article supplement (PMC6615088; doi:10.1186/s12889-019-7214-2), 2019-07-08
Supplement: 12889_2019_7214_MOESM2_ESM.pdf [file 12889_2019_7214_MOESM2_ESM.pdf]

**Participant Health Measures**  
**Colorado State University | Honduras Cookstove Project**

**Date:** \_\_\_\_\_ **Name:** \_\_\_\_\_ **Age:** \_\_\_\_\_ years

**General**

My weight is: \_\_\_\_\_ pounds                      My height is: \_\_\_\_\_ inches  
 My body mass index (BMI) is: \_\_\_\_\_                      My blood pressure is: \_\_\_\_\_ / \_\_\_\_\_

*What do these numbers mean?*

| Adult BMI       | Status      |
|-----------------|-------------|
| Below 18.5      | Underweight |
| 18.5 – 24.9     | Normal      |
| 25.0 – 29.9     | Overweight  |
| 30.0 and higher | Obese       |

| Blood Pressure (mmHg) | Status          |
|-----------------------|-----------------|
| Less than 120 / 80    | Normal          |
| 120-139 / 80-89       | Prehypertension |
| 140 / 90 and higher   | High            |

**Diabetes**

My hemoglobin A1c is (measure of blood sugar): \_\_\_\_\_ %

*What do these numbers mean?*

| Hemoglobin A1c (%) | Status      |
|--------------------|-------------|
| 4 - 5.6            | Normal      |
| 5.7 - 6.4          | Prediabetes |
| 6.5 or higher      | Diabetes    |

**Blood Lipids (non-fasting)**

My total cholesterol level is: \_\_\_\_\_ mg/dL                      My triglyceride level is: \_\_\_\_\_ mg/dL

*What do these numbers mean?*

| Total cholesterol (mg/dL) | Status          |
|---------------------------|-----------------|
| 200 or less               | Normal          |
| 201 – 239                 | Borderline high |
| 240 and higher            | High            |

| Triglyceride level (mg/dL) | Status          |
|----------------------------|-----------------|
| Less than 150              | Normal          |
| 150 – 199                  | Borderline high |
| 200 or higher              | Very high       |

**NOTE:** *We are not doctors and cannot diagnose or treat health problems. These results are general measures of your health; they are not meant to diagnose a disease. If you have any questions or concerns with your numbers, please see your community health center or physician.*

Figure S2. Participant health feedback form, English version. Participant’s results were circled with the corresponding status, and results were explained. As mentioned in the form, participants were encouraged to visit a community health center or physician if they had any further questions or concerns.
