# Supplementary material for: Study protocol for a stepped-wedge randomized cookstove intervention in rural Honduras: household air pollution and cardiometabolic health
Source: Springer Nature journal article supplement (doi:10.1186/s12889-019-7214-2), 2019-07-08
Supplement: MOESM1 [file 16907468]

## STEPS FOR THE MAINTENANCE AND USE OF THE ECO-STOVE JUSTA IN THE HOME

### Size and Type of Wood

- Use thin and short wood (less than 2 inches in diameter).
- Use wood that is well-dried – do not use much ocote.
- Never burn trash or plastic!

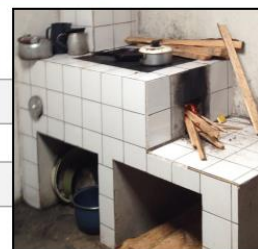

### Steps to Care for and Maintain the Eco-Stove Justa

#### DAILY:

a. Apply oil or margarine on top of the griddle with a thick cloth, do not use water.

b. Clean out the ashes from inside the combustion chamber.

c. Clean the internal conduction area that separates the ash from the chimney to remove accumulated soot.

d. Keep the cap of the soot can firmly in place.

e. Level the ash below the griddle before replacing it and seal the four sides of the griddle with ash. Make sure the ash is completely dry.

f. Leave 1 inch of space between the ash and the griddle.

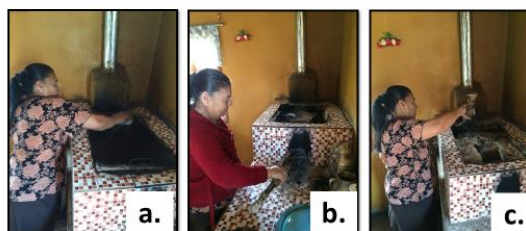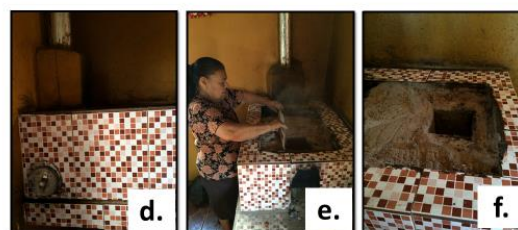

#### EVERY 8 DAYS:

g. Rotate the griddle every 8 days and remove the soot from underneath the griddle with a broom.

h. Lightly tap the chimney every 8 days and take out the soot from the side can.

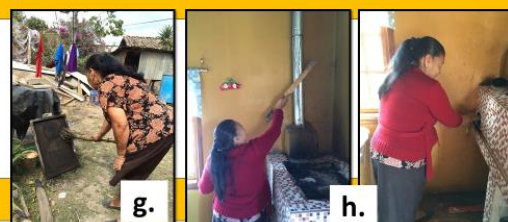

#### EVERY 3 MONTHS:

i. Clean the chimney inside with a broom and confirm that it is sealed where it exits through the roof.

For more information, contact [redacted] cell: [redacted]

Figure S1. *Justa* cookstove training poster, English version. Posters were printed on water-resistant laminate material, hung near the *Justa* cookstove, and reviewed during in-person training and subsequent study visits.
